# Supplementary material
Source: PubMed Central journal article supplement (PMC6123409)
Supplement: 41422_2018_70_MOESM3_ESM.pdf [file 41422_2018_70_MOESM3_ESM.pdf]

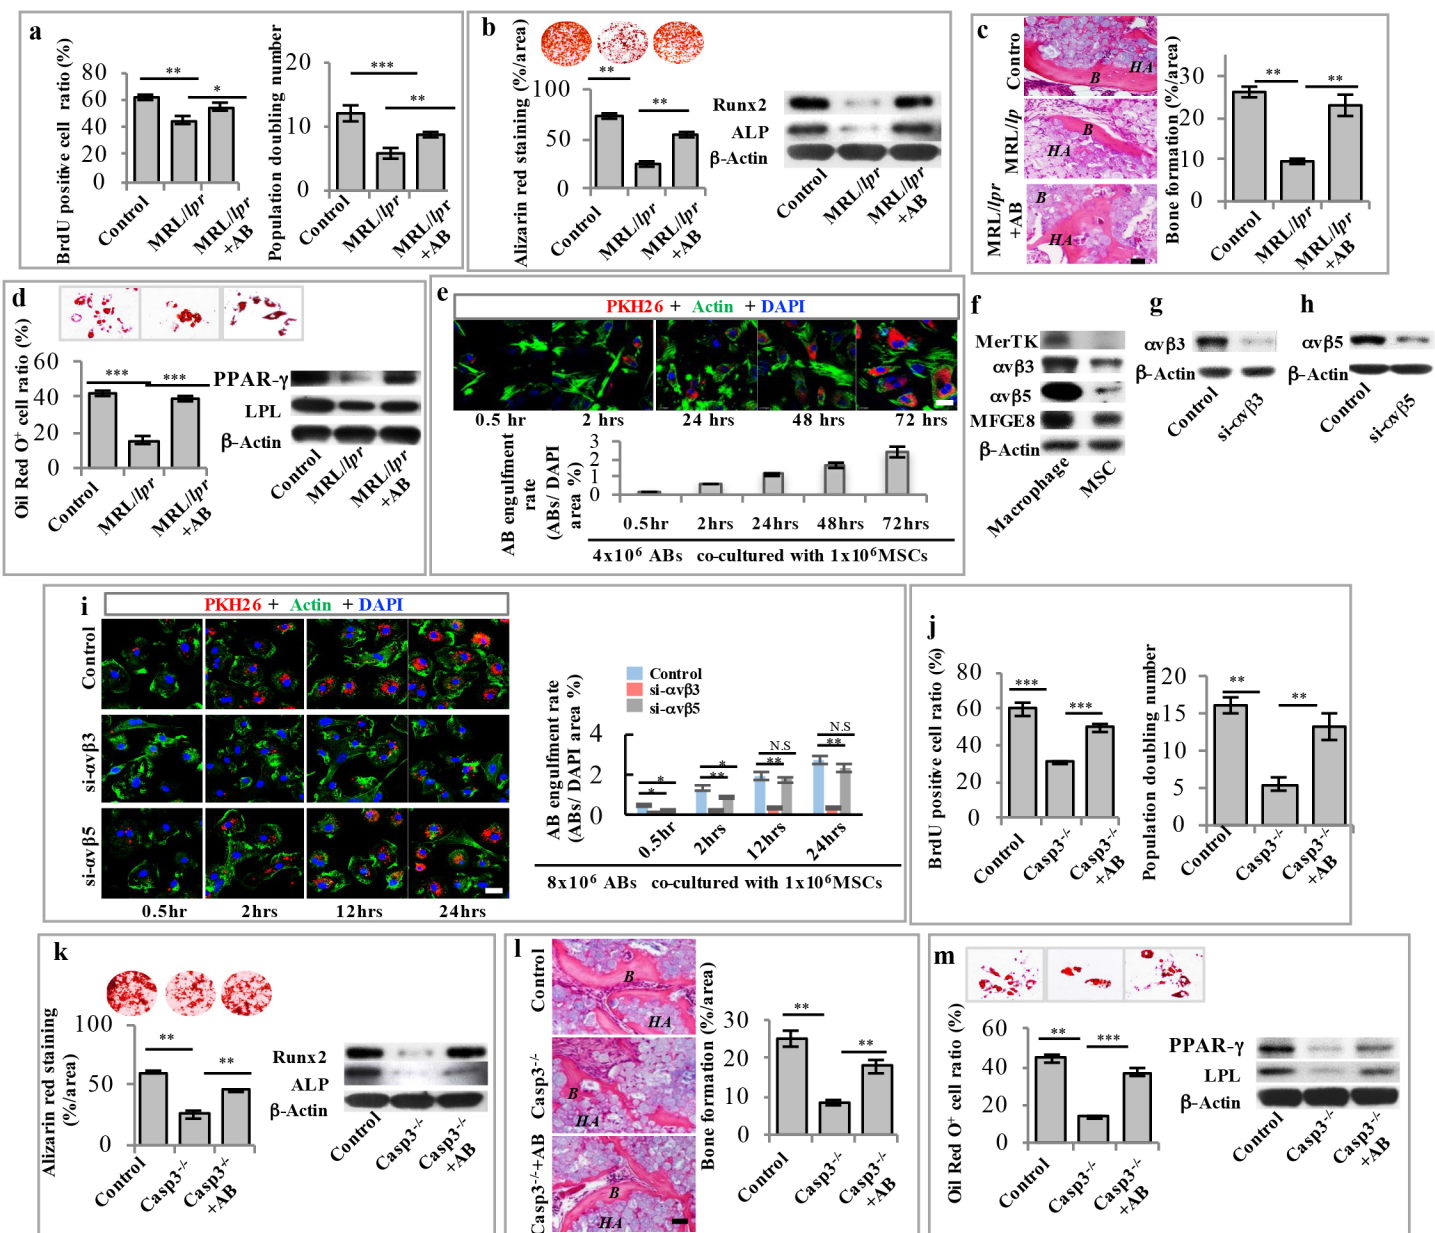

**Supplementary Figure 3. In vitro apoptotic body treatment rescued impaired MRL/lpr and Casp3<sup>-/-</sup> MSCs.** **a**, BrdU labeling and continued passage assay showed that apoptotic body treatment rescued the reduced proliferation and population doubling rates of MRL/lpr MSCs. **b**, Apoptotic body-treated MRL/lpr MSCs showed significantly increased capacities to form mineralized nodules, as assessed by alizarin red staining (n = 5), and expression of osteogenic markers Runx2 and ALP, as assessed by Western blot. **c**, Apoptotic body-treated MRL/lpr MSCs showed increased capacities to form new bone when implanted into immunocompromised mice subcutaneously using HA/TCP as a carrier (n = 5). H&E staining showed newly formed bone (B) and HA/TCP (HA) carrier. **d**, Apoptotic body-treated MRL/lpr MSCs showed significantly increased capacities to differentiate into adipocytes under the adipogenic inductive conditions, as assessed by Oil red O staining (n = 5), and expression of adipogenic markers PPAR- $\gamma$  and LPL, as assessed by Western blot. **e**, When co-cultured with MSCs, PKH26-labeled apoptotic bodies (red) were engulfed by MRL/lpr MSCs, as assessed by immunofluorescent staining. **f**, Western blot showed that MSCs expressed  $\alpha$ v $\beta$ 3,  $\alpha$ v $\beta$ 5 and MFGE8, but not MerTK. Macrophages were used as a positive control. **g**, **h** Western blot showed that  $\alpha$ v $\beta$ 3 and  $\alpha$ v $\beta$ 5 siRNA knockdown effectively inhibited  $\alpha$ v $\beta$ 3 and  $\alpha$ v $\beta$ 5 expression in MSCs, respectively. **i**,  $\alpha$ v $\beta$ 3, but not  $\alpha$ v $\beta$ 5, siRNA treatment blocked MSC-mediated engulfment of apoptotic bodies in the co-culture, as assessed by immunofluorescent staining. **j**, BrdU labeling and continued passage assay showed that apoptotic body treatment rescued the reduced proliferation and population doubling rates in cultured Casp3<sup>-/-</sup> MSCs. **k**, Apoptotic body-treated Casp3<sup>-/-</sup> MSCs showed significantly increased capacities to form mineralized nodules, as assessed by alizarin red staining (n = 5), and upregulated expression of osteogenic markers Runx2 and ALP, as assessed by Western blot. **l**, Apoptotic body-treated Casp3<sup>-/-</sup> MSCs showed increased capacities to form new bone when implanted into immunocompromised mice subcutaneously using HA/TCP as a carrier (n = 5). H&E staining showed newly formed bone (B) and HA/TCP (HA) carrier. **m**, Apoptotic body-treated Casp3<sup>-/-</sup> MSCs showed significantly increased capacities to differentiate into adipocytes under the adipogenic inductive conditions, as assessed by Oil red O staining (n = 5), and upregulated expression of PPAR- $\gamma$  and LPL, as assessed by Western blot. All results are representative of data generated in three independent experiments. Error bars represent the S.D. from the mean values. \*\*\**P* < 0.001; \*\**P* < 0.01; \**P* < 0.05. Scale bar, 50  $\mu$ m (c, l), 25  $\mu$ m (e, i).
