# Supplementary material
Source: PubMed Central journal article supplement (PMC6123409)
Supplement: 41422_2018_70_MOESM5_ESM.pdf [file 41422_2018_70_MOESM5_ESM.pdf]

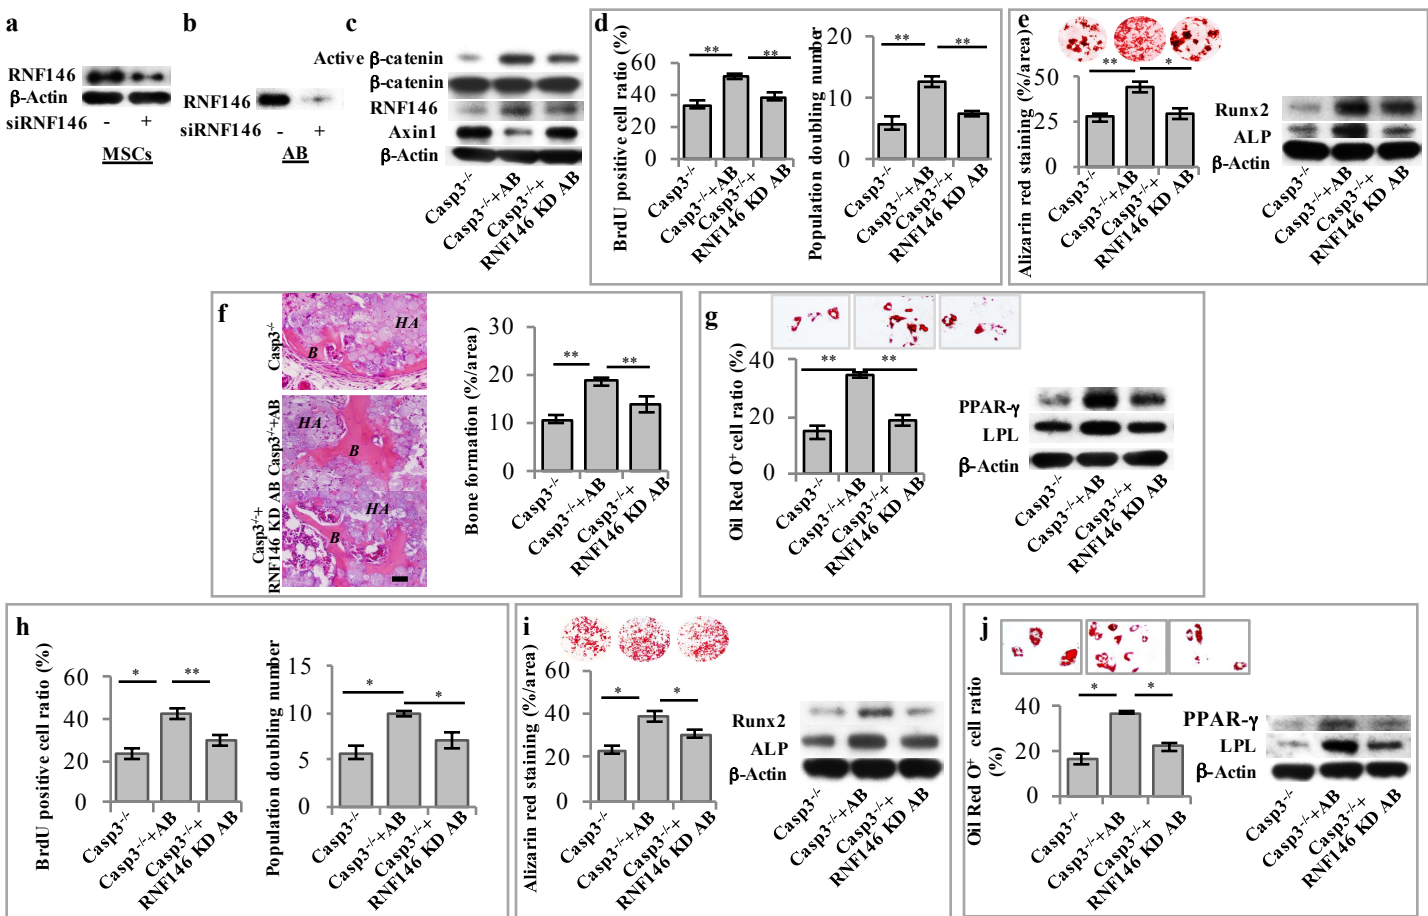

**Supplementary Figure 5. RNF146 played an essential role in apoptotic body-mediated rescue of impaired *Casp3*<sup>-/-</sup> MSCs.** **a**, Western blot showed that RNF146 siRNA effectively inhibited RNF146 expression in MSCs. **b**, Western blot showed that the level of RNF146 in apoptotic bodies derived from RNF146 siRNA-treated MSCs was significantly reduced when compared to the control group. **c**, Western blot showed that systemic infusion of apoptotic bodies from RNF146 siRNA knockdown MSCs failed to upregulate active  $\beta$ -catenin expression and downregulate Axin1 expression in *Casp3*<sup>-/-</sup> MSCs when compared to the control group at 4 weeks post-infusion.  $\beta$ -Actin was used as a protein loading control. **d**, BrdU labeling and continued passage assay showed that apoptotic bodies derived from RNF146 siRNA knockdown MSCs failed to rescue reduced proliferation and population doubling rates in *Casp3*<sup>-/-</sup> MSCs when compared to the control group. **e**, Apoptotic bodies derived from RNF146 siRNA knockdown MSCs also failed to rescue reduced capacities to form mineralized nodules in *Casp3*<sup>-/-</sup> MSCs at 4 weeks post-infusion when cultured under the osteogenic inductive conditions, as assessed by alizarin red staining ( $n = 5$ ), and expression levels of Runx2 and ALP, as assessed by Western blot. **f**, Apoptotic bodies derived from RNF146 siRNA knockdown MSCs failed to rescue the reduced capacity to generate new bone in *Casp3*<sup>-/-</sup> MSCs at 4 weeks post-infusion when implanted into immunocompromised mice subcutaneously using HA/TCP as a carrier ( $n = 5$ ). H&E staining showed newly formed bone (B) and HA/TCP (HA) carrier. **g**, Apoptotic bodies derived from RNF146 siRNA knockdown MSCs failed to rescue the reduced capacity to differentiate into adipocytes under the adipogenesis inductive conditions, as assessed by Oil red O staining ( $n = 5$ ), and expression levels of PPAR- $\gamma$  and LPL, as assessed by Western blot, at 4 weeks post-infusion. **h**, BrdU labeling and continued passage assay confirmed that apoptotic bodies derived from RNF146 siRNA knockdown MSCs failed to rescue the reduced proliferation and population doubling rates of culture-expanded *Casp3*<sup>-/-</sup> MSCs. **i**, Apoptotic bodies derived from RNF146 siRNA knockdown MSCs failed to rescue the reduced capacity to form mineralized nodules under the osteogenic inductive conditions, as assessed by alizarin red staining ( $n = 5$ ), and expression of Runx2 and ALP, as assessed by Western blot, in culture-expanded *Casp3*<sup>-/-</sup> MSCs. **j**, Apoptotic bodies derived from RNF146 siRNA knockdown MSCs failed to rescue the reduced capacity to differentiate into adipocytes under the adipogenic inductive conditions, assessed by Oil red O staining ( $n = 5$ ), and expression of PPAR- $\gamma$  and LPL, assessed by Western blot, in culture-expanded *Casp3*<sup>-/-</sup> MSCs. All results are representative of data generated in three independent experiments. Error bars represent the S.D. from the mean values. \*\* $P < 0.01$ ; \* $P < 0.05$ . Scale bar, 50  $\mu$ m (f). KD, knockdown.
