# Supplementary material
Source: PubMed Central journal article supplement (PMC6123409)
Supplement: 41422_2018_70_MOESM8_ESM.pdf [file 41422_2018_70_MOESM8_ESM.pdf]

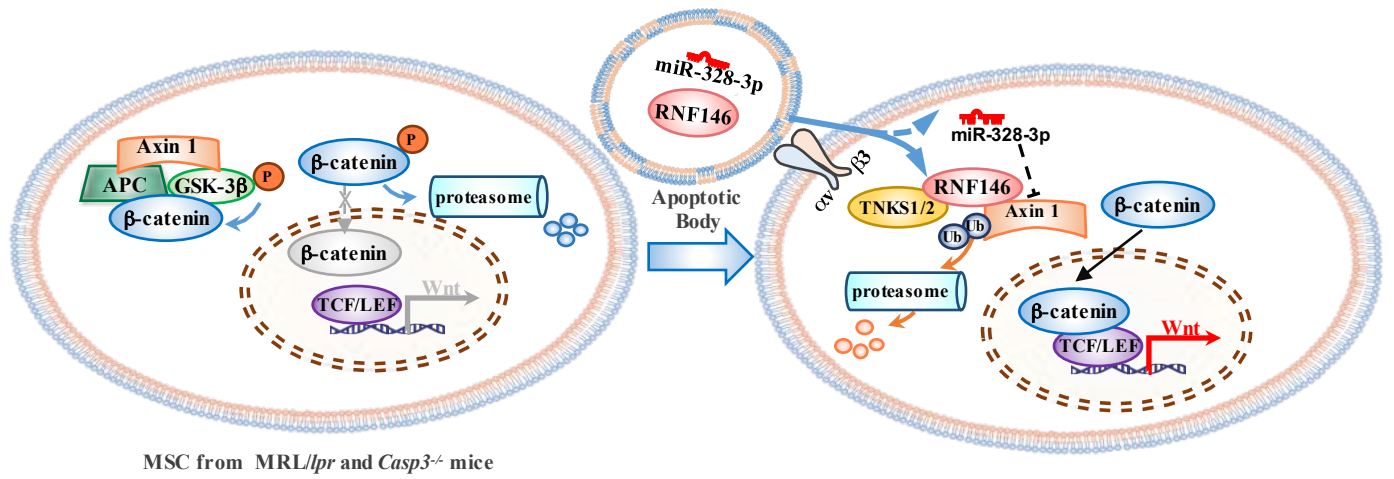

MSC from *MRL/lpr* and *Casp3<sup>-/-</sup>* mice

**Supplementary Figure 8.** Schematic diagram of apoptotic body providing RNF146 and miR-328-3p to rescue impaired MSCs in apoptotic deficient *MRL/lpr* and *Casp3<sup>-/-</sup>* mice *via* inhibition of Axin 1 and activation of Wnt/β-catenin signaling.
