# Supplementary material
Source: PubMed Central journal article supplement (PMC6123409)
Supplement: 41422_2018_70_MOESM9_ESM.pdf [file 41422_2018_70_MOESM9_ESM.pdf]

**Supplementary Table 1. miRNA hits on Axin1**

| <b>pre_miR_product_id</b> | <b>pre_miR_id</b> | <b>mature_miR_id</b> | <b>DIANA Score</b> | <b>targetscan Score</b> |
|---------------------------|-------------------|----------------------|--------------------|-------------------------|
| MmiR3283                  | mmu-mir-124-1     | mmu-miR-124-3p       | 0.846              | -0.205                  |
| MmiR3451                  | mmu-mir-126a      | mmu-miR-126a-5p      | 0.858              | -0.083                  |
| MmiR3277                  | mmu-mir-138-1     | mmu-miR-138-5p       | 0.516              | -0.171                  |
| MmiR3430                  | mmu-mir-152       | mmu-miR-152-3p       | 0.477              | -0.167                  |
| MmiR3416                  | mmu-mir-24-1      | mmu-miR-24-3p        | 0.545              | -0.155                  |
| MmiR3410                  | mmu-mir-199a-1    | mmu-miR-199a-3p      | 0.498              | -0.174                  |
| MmiR3408                  | mmu-mir-201       | mmu-miR-201-5p       | 0.705              | -0.31                   |
| MmiR3374                  | mmu-mir-148a      | mmu-miR-148a-3p      | 0.488              | -0.167                  |
| MmiR3354                  | mmu-mir-22        | mmu-miR-22-3p        | 0.718              | -0.223                  |
| MmiR3332                  | mmu-mir-328       | mmu-miR-328-3p       | 0.479              | -0.177                  |
| MmiR3327                  | mmu-mir-148b      | mmu-miR-148b-3p      | 0.484              | -0.167                  |
| MmiR3260                  | mmu-mir-377       | mmu-miR-377-3p       | 0.556              | -0.234                  |
| MmiR3241                  | mmu-mir-370       | mmu-miR-370-3p       | 0.618              | -0.452                  |
| MmiR3219                  | mmu-mir-489       | mmu-miR-489-3p       | 0.592              | -0.167                  |
| MmiR3214                  | mmu-mir-546       | mmu-miR-546          | 0.573              | -0.207                  |
| MmiR3213                  | mmu-mir-540       | mmu-miR-540-3p       | 0.508              | -0.163                  |
